# Supplementary material for: Discrimination of Acne Vulgaris with Human Scalp Hair Tissues Using FTIR-ATR Spectroscopy
Source: Preprints.org preprint supplement (doi:10.20944/preprints201909.0166.v3), 2020-08-04
Supplement: Supplementary file 1 [file supplementary]

## Figures

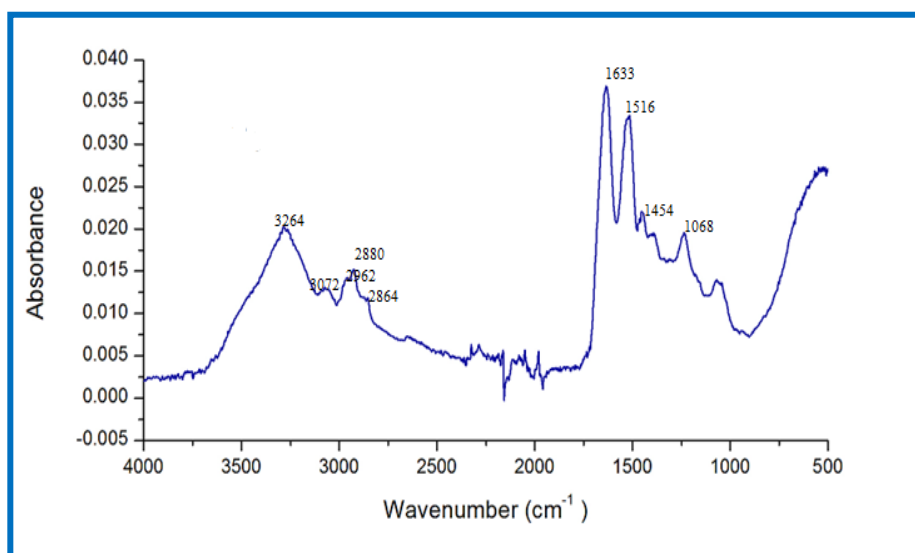

Figure 1 Average FTIR-ATR Spectrum of healthy Human Scalp Hair tissue

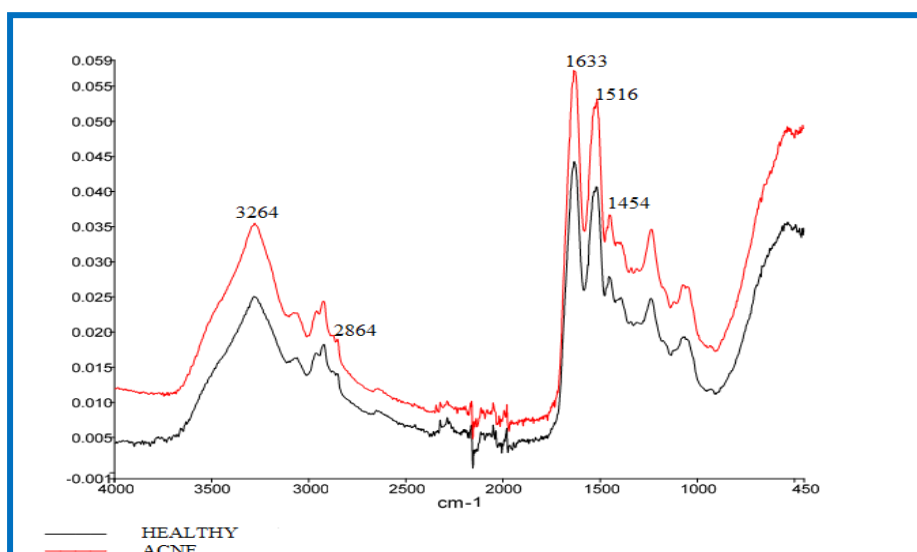

Figure 2 Overlaid Average FTIR-ATR Spectra of Healthy and Acne Vulgaris Human Scalp Hair tissues

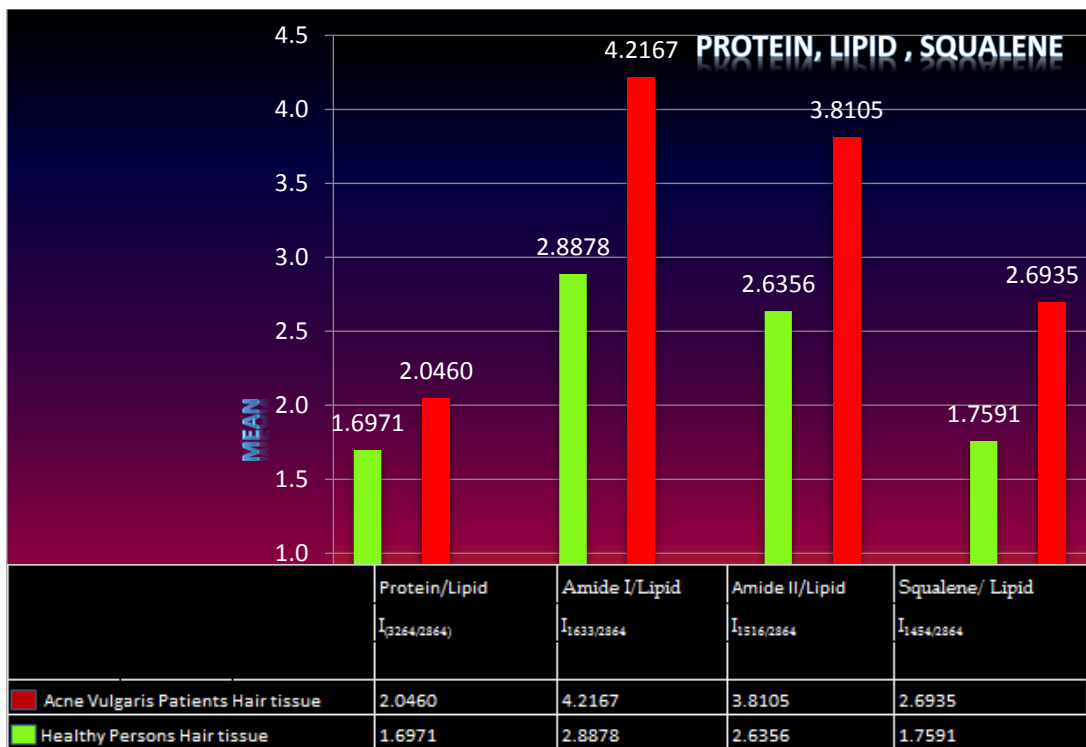

Figure 3 Histogram Indicating the Mean Intensity Ratios of Healthy and Acne Vulgaris Hair tissues of Protein / Lipid, Amide I / Lipid, Amide II / Lipid and Squalene / Lipid

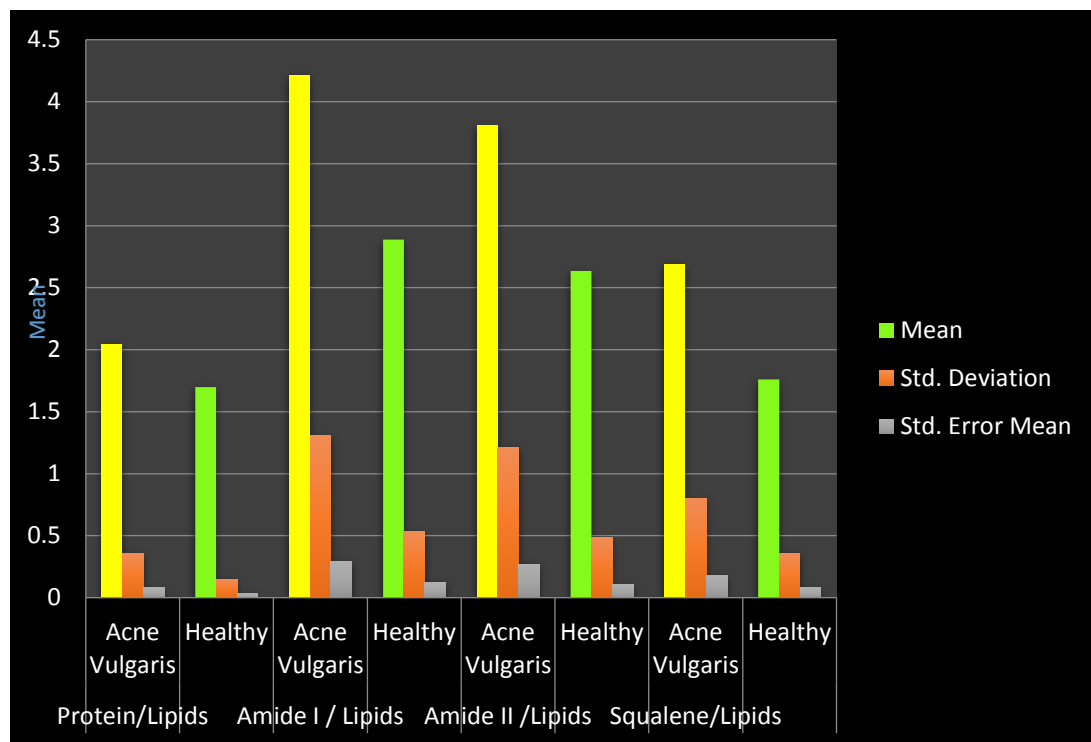

Figure 4 Group Statistics T-Test of Hair tissue of Healthy and Acne Vulgaris tissues of Protein / Lipid, Amide I / Lipid, Amide II / Lipid and Squalene / Lipid
