# Supplementary material for: Discrimination of Acne Vulgaris with Human Scalp Hair Tissues Using FTIR-ATR Spectroscopy
Source: Preprints.org preprint supplement (doi:10.20944/preprints201909.0166.v3), 2020-08-04
Supplement: Supplementary file 2 [file supplementary]

## Tables

**Table 1 FTIR-ATR spectrum and vibrational analysis of biomolecules present in the human scalp Hair tissue**

| Wavenumber (cm <sup>-1</sup> ) | Band Assignment                                                                         |
|--------------------------------|-----------------------------------------------------------------------------------------|
| 3264                           | N-H stretching mode (Amide A) of Protein                                                |
| 3072                           | Amide –B band due to overtone of Amide I band                                           |
| 2962                           | Asymmetric stretching vibrations of CH <sub>3</sub> of proteins and Lipids              |
| 2880                           | Asymmetric stretching vibrations of CH <sub>2</sub> methylene group of fatty acids      |
| 2864                           | CH <sub>3</sub> symmetric stretching of methane groups of proteins and Lipids           |
| 1633                           | C=O symmetric stretching vibrations of amide group Amide I                              |
| 1516                           | Amide II band due to N-H bending vibration strongly coupled C-N stretching of Proteins  |
| 1454                           | δ C-H/CH <sub>2</sub> /CH <sub>3</sub> of both lipid and protein groups (LDL), Squalene |
| 1245                           | Asymmetric P=O stretching vibrations of PO <sub>2</sub> stretching of Lipid Phosphate   |
| 1068                           | C-O stretching vibrations of glucose region                                             |

**Table 2 Intensity ratio parameters of Healthy and Acne Vulgaris tissues**

| Samples | Protein / Lipid          |               | Amide I / Lipid          |               | Amide II / Lipid         |               | Squalene / Lipid         |               |
|---------|--------------------------|---------------|--------------------------|---------------|--------------------------|---------------|--------------------------|---------------|
|         | I <sub>3264</sub> / 2864 |               | I <sub>1633</sub> / 2864 |               | I <sub>1516</sub> / 2864 |               | I <sub>1454</sub> / 2864 |               |
|         | Healthy                  | Acne Vulgaris |
| 1       | 1.9606                   | 2.8254        | 3.5906                   | 7.2222        | 3.3307                   | 6.6508        | 2.1969                   | 4.3968        |
| 2       | 1.7778                   | 1.9606        | 2.963                    | 3.6535        | 2.7099                   | 3.3386        | 1.016                    | 2.1732        |
| 3       | 1.6233                   | 2.9211        | 2.214                    | 6.9605        | 2.0605                   | 6.3158        | 1.4186                   | 4.3026        |
| 4       | 2.0000                   | 2.0758        | 4.5606                   | 4.2424        | 4.1364                   | 3.7273        | 2.8485                   | 2.6136        |
| 5       | 1.7241                   | 2.2661        | 3.1724                   | 5.2110        | 2.8793                   | 4.6881        | 1.9052                   | 3.3028        |
| 6       | 1.7711                   | 2.2427        | 2.811                    | 5.3786        | 2.607                    | 4.8155        | 1.7662                   | 3.2816        |
| 7       | 1.6933                   | 1.7591        | 2.6626                   | 3.4234        | 2.4601                   | 3.0949        | 1.6503                   | 2.1825        |
| 8       | 1.8571                   | 2.0918        | 3.0357                   | 5.2449        | 2.6929                   | 4.7347        | 1.7786                   | 3.2347        |
| 9       | 1.5848                   | 1.8293        | 2.2712                   | 3.0732        | 1.9915                   | 2.6768        | 1.3051                   | 1.8293        |
| 10      | 1.6418                   | 1.7349        | 2.8806                   | 2.9628        | 2.6119                   | 2.7372        | 1.8060                   | 1.7930        |
| 11      | 1.5773                   | 1.7667        | 2.493                    | 2.9528        | 2.2448                   | 2.7444        | 1.6399                   | 1.7922        |
| 12      | 1.7750                   | 1.8122        | 2.975                    | 2.9771        | 2.7875                   | 2.7863        | 1.9000                   | 1.9542        |
| 13      | 1.3119                   | 2.1529        | 2.1835                   | 3.9529        | 2.0367                   | 3.6000        | 1.5688                   | 2.4118        |
| 14      | 1.6310                   | 1.7725        | 2.506                    | 2.5059        | 2.2798                   | 2.2797        | 1.5536                   | 1.5536        |
| 15      | 1.6418                   | 1.7035        | 2.8806                   | 3.6627        | 2.6119                   | 2.7209        | 1.806                    | 2.5930        |
| 16      | 1.6340                   | 1.6901        | 3.0825                   | 3.7777        | 2.8041                   | 3.4327        | 1.8763                   | 2.6783        |
| 17      | 1.7238                   | 2.0000        | 3.1429                   | 4.1066        | 2.8952                   | 3.8361        | 1.9429                   | 2.5000        |
| 18      | 1.6995                   | 2.0544        | 2.8653                   | 3.9116        | 2.5959                   | 3.4966        | 1.7668                   | 3.2176        |
| 19      | 1.7407                   | 2.4944        | 2.9722                   | 5.4607        | 2.7315                   | 5.0899        | 1.7963                   | 3.3371        |
| 20      | 1.5734                   | 1.7666        | 2.493                    | 3.6527        | 2.2448                   | 3.4444        | 1.6399                   | 2.7222        |

**Table 3 Group Statistics T-Test of Hair tissues of Healthy and Acne Vulgaris tissues**

|                         | <b>Group</b>  | <b>N</b> | <b>Mean</b> | <b>Std. Deviation</b> | <b>Std. Error Mean</b> |
|-------------------------|---------------|----------|-------------|-----------------------|------------------------|
| <b>Protein / Lipid</b>  | Acne Vulgaris | 20       | 2.0460      | 0.3584                | 0.0801                 |
|                         | Healthy       | 20       | 1.6971      | 0.1485                | 0.0332                 |
| <b>Amide I / Lipid</b>  | Acne Vulgaris | 20       | 4.2167      | 1.3056                | 0.2919                 |
|                         | Healthy       | 20       | 2.8878      | 0.5313                | 0.1188                 |
| <b>Amide II / Lipid</b> | Acne Vulgaris | 20       | 3.8105      | 1.2124                | 0.2711                 |
|                         | Healthy       | 20       | 2.6356      | 0.4868                | 0.1089                 |
| <b>Squalene / Lipid</b> | Acne Vulgaris | 20       | 2.6935      | 0.7971                | 0.1782                 |
|                         | Healthy       | 20       | 1.7591      | 0.3603                | 0.0806                 |

**Table 4 Independent Samples t-Test of Healthy and Acne Vulgaris Hair tissues**

| Internal Ratio<br>Parameter<br>(IRP) | Levene's Test for Equality of<br>Variances |        |       | t-test for Equality of Means |       |                    |                    |                          |                                                 |        |
|--------------------------------------|--------------------------------------------|--------|-------|------------------------------|-------|--------------------|--------------------|--------------------------|-------------------------------------------------|--------|
|                                      |                                            | F      | Sig.  | t                            | df    | Sig.<br>(2-tailed) | Mean<br>Difference | Std. Error<br>Difference | 95% Confidence<br>Interval of the<br>Difference |        |
| R1 =Protein /<br>Lipid               | Equal<br>variances<br>assumed              | 8.893  | 0.005 | 4.022                        | 38.00 | 0.000              | 0.3488             | 0.0867                   | 0.1732                                          | 0.5244 |
|                                      | Equal<br>variances not<br>assumed          |        |       | 4.022                        | 25.33 | 0.000              | 0.3488             | 0.0867                   | 0.1703                                          | 0.5274 |
| R2 =Amide I/<br>Lipid                | Equal<br>variances<br>assumed              | 10.637 | 0.002 | 4.684                        | 38.00 | 0.000              | 1.4148             | 0.3021                   | 0.8032                                          | 2.0263 |
|                                      | Equal<br>variances not<br>assumed          |        |       | 4.684                        | 25.72 | 0.000              | 1.4148             | 0.3021                   | 0.7935                                          | 2.0360 |
| R3 =Amide II/<br>Lipid               | Equal<br>variances<br>assumed              | 10.518 | 0.002 | 4.463                        | 38.00 | 0.000              | 1.2532             | 0.2808                   | 0.6847                                          | 1.8217 |
|                                      | Equal<br>variances not<br>assumed          |        |       | 4.463                        | 25.51 | 0.000              | 1.2532             | 0.2808                   | 0.6755                                          | 1.8310 |
| R4= Squalene/<br>Lipid               | Equal<br>variances<br>assumed              | 9.204  | 0.004 | 5.288                        | 38.00 | 0.000              | 0.9856             | 0.1863                   | 0.6083                                          | 1.3629 |
|                                      | Equal<br>variances not<br>assumed          |        |       | 5.288                        | 27.29 | 0.000              | 0.9856             | 0.1864                   | 0.6033                                          | 1.3678 |
