# Supplementary material for: Discrimination of Acne Vulgaris with Human Scalp Hair Tissues Using FTIR-ATR Spectroscopy
Source: Preprints.org preprint supplement (doi:10.20944/preprints201909.0166.v3), 2020-08-04
Supplement: Supplementary file 4 [file supplementary]

Archive with 3 entries (3 files):
- New folder/Abs Fig.pdf
- New folder/Figures - Copy.pdf
- New folder/Tables - Copy.pdf
